# Supplementary material
Source: PubMed Central journal article supplement (PMC2926814)

## Online Supplement Tables A, B, & C

**Online Table A:** Allele distribution in the overall sample, in the Caucasians and African Americans, and Hardy Weinberg Equilibrium test

|                     | <b>Overall</b> | <b>Caucasians</b> | <b>African Americans</b> | <b>HWE p-value</b> |
|---------------------|----------------|-------------------|--------------------------|--------------------|
| <b>ACEID, n</b>     | 2974           | 1746              | 1228                     |                    |
| ACEID genotypes     | D/D: 32%       | 31%               | 33%                      | <i>W=0.43</i>      |
|                     | I/D: 49%       | 49%               | 49%                      | <i>AA=0.88</i>     |
|                     | I/I: 19%       | 20%               | 18%                      |                    |
| <b>AGT-M235T, n</b> | 2934           | 1719              | 1215                     |                    |
| AGT-M235T           | C/C: 38%       | 18%               | 65%                      | <i>W=0.94</i>      |
|                     | C/T: 41%       | 49%               | 31%                      | <i>AA=0.43</i>     |
|                     | T/T: 21%       | 33%               | 4%                       |                    |
| <b>AGT -6G/A, n</b> | 2943           | 1724              | 1214                     |                    |
| AGT -6G/A           | A/A: 39%       | 18%               | 68%                      | <i>W=0.85</i>      |
|                     | A/G: 41%       | 48%               | 29%                      | <i>AA=0.61</i>     |
|                     | G/G: 20%       | 32%               | 3%                       |                    |

HWE: Hardy Weinberg Equilibrium; ACEID: Angiotensin converting enzyme gene insertion deletion;

AGT: Angiotensinogen gene; A: Adenine; C: Cytosine; T: Thymine; G: Guanine; I: Insertion; D:

Deletion

**Online Table-B:** Characteristics of the overall sample and those on ACEINH and not on ACEINH

|                                             | <b>Overall</b> | <b>Not on ACEINH</b> | <b>On ACEINH</b> | <b>p-value</b> |
|---------------------------------------------|----------------|----------------------|------------------|----------------|
| <i>N</i>                                    | 3075           | 2600                 | 465              |                |
| Age, mean±standard error (SE), years        | 73.63±0.05     | 73.66±0.06           | 73.45±0.14       | 0.1395         |
| Gender, % women                             | 1584 (52%)     | 1347 (52%)           | 231 (50%)        | 0.3972         |
| Race, %African Americans                    | 1273 (41%)     | 1053 (41%)           | 220 (47%)        | 0.006          |
| Body Mass Index, mean±SE, kg/m <sup>2</sup> | 27.39±0.09     | 27.20±0.09           | 28.52±0.23       | <0.0001        |
| Education level, Mean±SE, years             | 13.04±0.07     | 13.06±0.08           | 12.97±0.15       | <0.0001        |
| Systolic Blood Pressure, mean±SE, mm Hg     | 135.86±0.38    | 135.07±0.40          | 140.41±1.08      | <0.0001        |
| Diastolic Blood Pressure, mean±SE, mm Hg    | 71.42±0.21     | 71.17±0.23           | 72.85±0.58       | <0.0001        |
| Current smoker, n (%)                       | 318 (10%)      | 271 (10%)            | 46 (10%)         | 0.71           |
| Alcohol, mean±SE drinks per day             | 2.12±0.03      | 2.15±0.03            | 1.97±0.07        | 0.0211         |
| Energy expenditure, KCAL/KG/WEEK            | 7.68±0.32      | 7.76±0.35            | 7.21±0.81        | 0.54           |
| <b>Laboratory</b>                           |                |                      |                  |                |
| LDL, mean±SE, mg/dl                         | 121.54±0.63    | 121.81±0.68          | 120.09±1.72      | 0.3319         |
| HDL, mean±SE, mg/dl                         | 54.09±0.31     | 54.51±0.34           | 51.67±0.75       | 0.001          |
| Cholesterol, mean±SE, mg/dl                 | 202.81±0.70    | 203.23±0.75          | 200.48±1.98      | 0.1587         |
| <b>Morbidities, n (%):</b>                  |                |                      |                  |                |
| Hypertension                                | 1563 (51%)     | 1142 (44%)           | 416 (90%)        | <0.0001        |

|                          |            |            |           |         |
|--------------------------|------------|------------|-----------|---------|
| Diabetes                 | 460 (15%)  | 335 (13%)  | 124 (27%) | <0.0001 |
| Coronary Artery Disease  | 105 (3%)   | 80 (3%)    | 25 (5%)   | 0.0118  |
| Congestive Heart Failure | 95 (3%)    | 57 (2%)    | 38 (8%)   | <0.0001 |
| Cancer                   | 4 (4%)     | 2 (2%)     | 2 (11%)   | 0.073   |
| Stroke                   | 223 (7%)   | 172 (7%)   | 51 (11%)  | 0.0011  |
| Arthritis                | 1719 (57%) | 1449 (57%) | 265 (58%) | 0.6987  |

#### Neuropsychological tests, score

##### mean±SE

|                |            |            |            |        |
|----------------|------------|------------|------------|--------|
| CLOX1 (year 3) | 10.61±0.05 | 10.63±0.05 | 10.47±0.12 | 0.175  |
| 3MSE           | 90.04±0.15 | 90.14±0.17 | 89.60±0.37 | 0.2018 |
| DSST           | 35.24±0.27 | 35.45±0.29 | 34.09±0.70 | 0.0712 |
| CES-D          | 4.72±0.10  | 4.73±0.10  | 4.73±0.27  | 0.9957 |

#### Medications

|                                                 |            |             |            |         |
|-------------------------------------------------|------------|-------------|------------|---------|
| Receiving antihypertensives, n (%)              | 1673 (55%) | 12.08 (47%) | 465 (100%) | <0.0001 |
| Angiotensin converting enzyme inhibitors, n (%) | 465 (15%)  | NA          | NA         |         |
| Diuretics, n (%)                                | 312 (10%)  | 271 (10%)   | 41 (9%)    | 0.2915  |
| Beta Blockers, n (%)                            | 410 (13%)  | 350 (14%)   | 60 (13%)   | 0.7446  |
| Calcium channel blocker, n (%)                  | 705 (23%)  | 582 (22%)   | 123 (27%)  | 0.0549  |
| Angiotensin receptor blockers, n (%)            | 70 (2%)    | 70 (3%)     | 0          | 0.0003  |
| Hormonal Supplement, n( %)                      | 349 (11%)  | 298 (12%)   | 51 (11%)   | 0.7575  |

---

CLOX1: Executive clock draw test; DSST: Digit symbol substitution test; 3MSE:

Modified mini mental status examination; CESD: Center for Epidemiologic Studies Depression Scale

**Table C:** longitudinal association between gene and cognitive function in Caucasians and African Americans (combined both ACEINH and NON-ACEINH exposure groups)

|                 | <b><i>p</i>-value for association between gene and cognitive decline</b> |                   |
|-----------------|--------------------------------------------------------------------------|-------------------|
|                 | Caucasians                                                               | African Americans |
| <i>ACE-ID</i>   |                                                                          |                   |
| CLOX1           | 0.96                                                                     | 0.82              |
| DSST            | 0.031                                                                    | 0.58              |
| 3MSE            | 0.67                                                                     | 0.79              |
| <i>AGT6</i>     |                                                                          |                   |
| CLOX1           | 0.007                                                                    | 0.60              |
| DSST            | 0.50                                                                     | 0.04              |
| 3MSE            | 0.64                                                                     | 0.33              |
| <i>AGTM235T</i> |                                                                          |                   |
| CLOX1           | 0.01                                                                     | 0.98              |
| DSST            | 0.02                                                                     | 0.36              |
| 3MSE            | 0.64                                                                     | 0.53              |

## Online Supplement Figures 1 & 2

**Figure1:** Longitudinal change in CLOX1 score by AGT6 genotypes (AA, AG, GG) in the 2 ACEINH groups in whites (A) and African Americans (B)

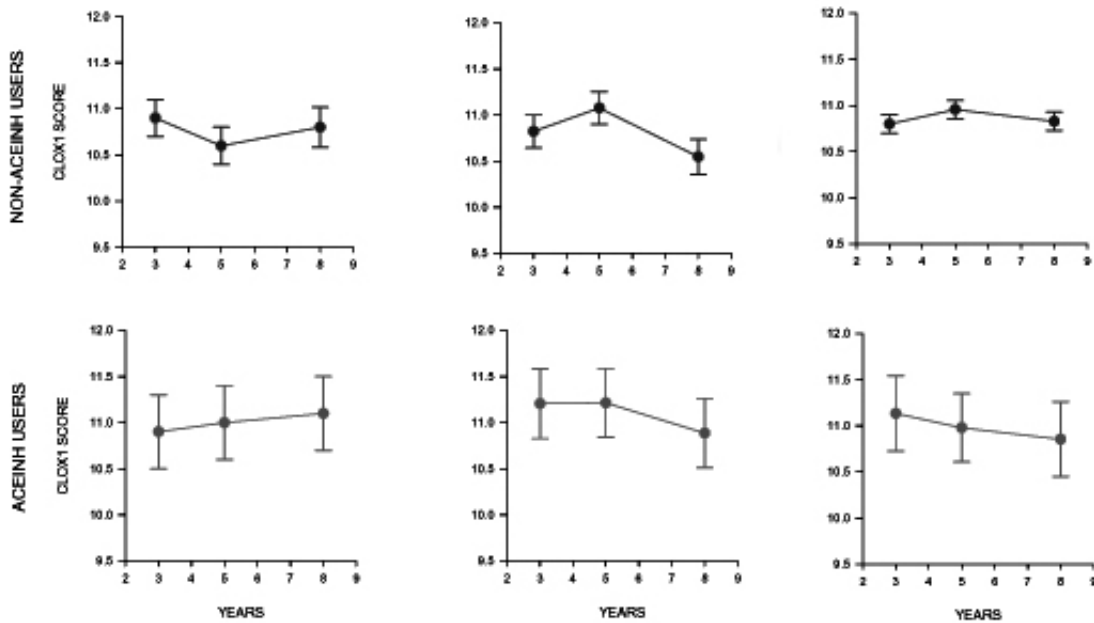

Footnote: Values are the least square means of CLOX1 scores adjusted for baseline CLOX1, age, gender, BMI, education, systolic blood pressure, stroke, APOE, diabetes, and other antihypertensives.

**Figure2:** Longitudinal change in CLOX1 score by AGTM235T genotypes (CC, CT,TT) in the overall sample and in the 2 ACEINH groups in the whites (A) and African Americans (B)

Footnote: Values are the least square means of CLOX1 scores adjusted for baseline CLOX1, age, gender, BMI, education, systolic blood pressure, stroke, APOE, diabetes, and other antihypertensives.

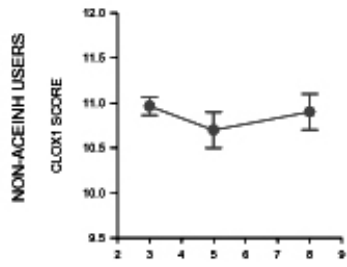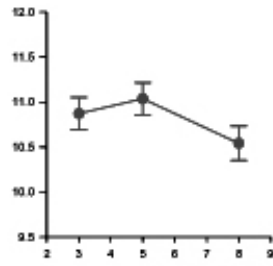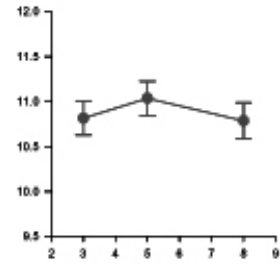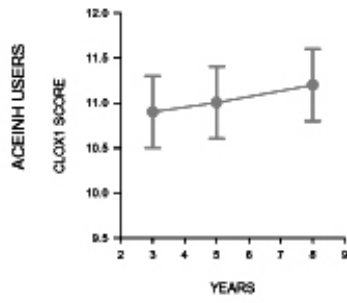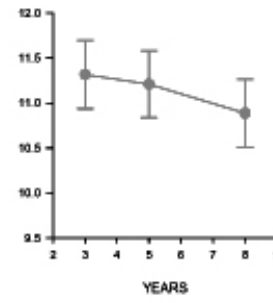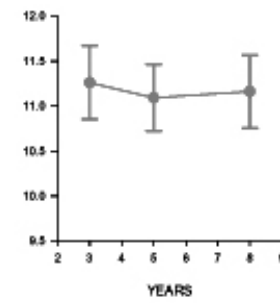

B-African Americans

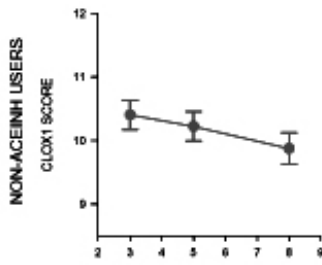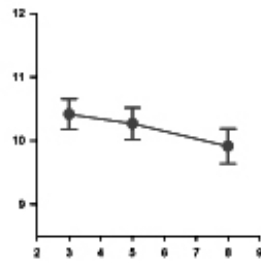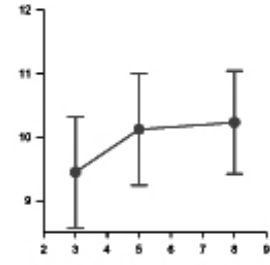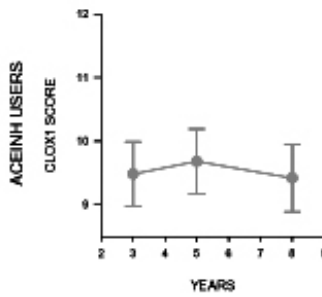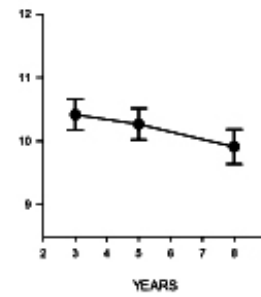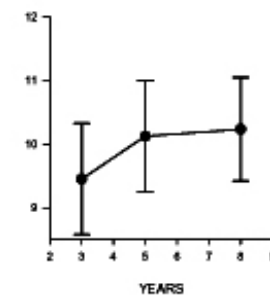

Supplement: NIHMS218678-supplement-supplement_1.pdf [file NIHMS218678-supplement-supplement_1.pdf]
